# Supplementary material
Source: MDPI journal article supplement (https://www.mdpi.com/2073-4395/14/5/890)
Supplement: s1 [file s1]

## Supplementary Material

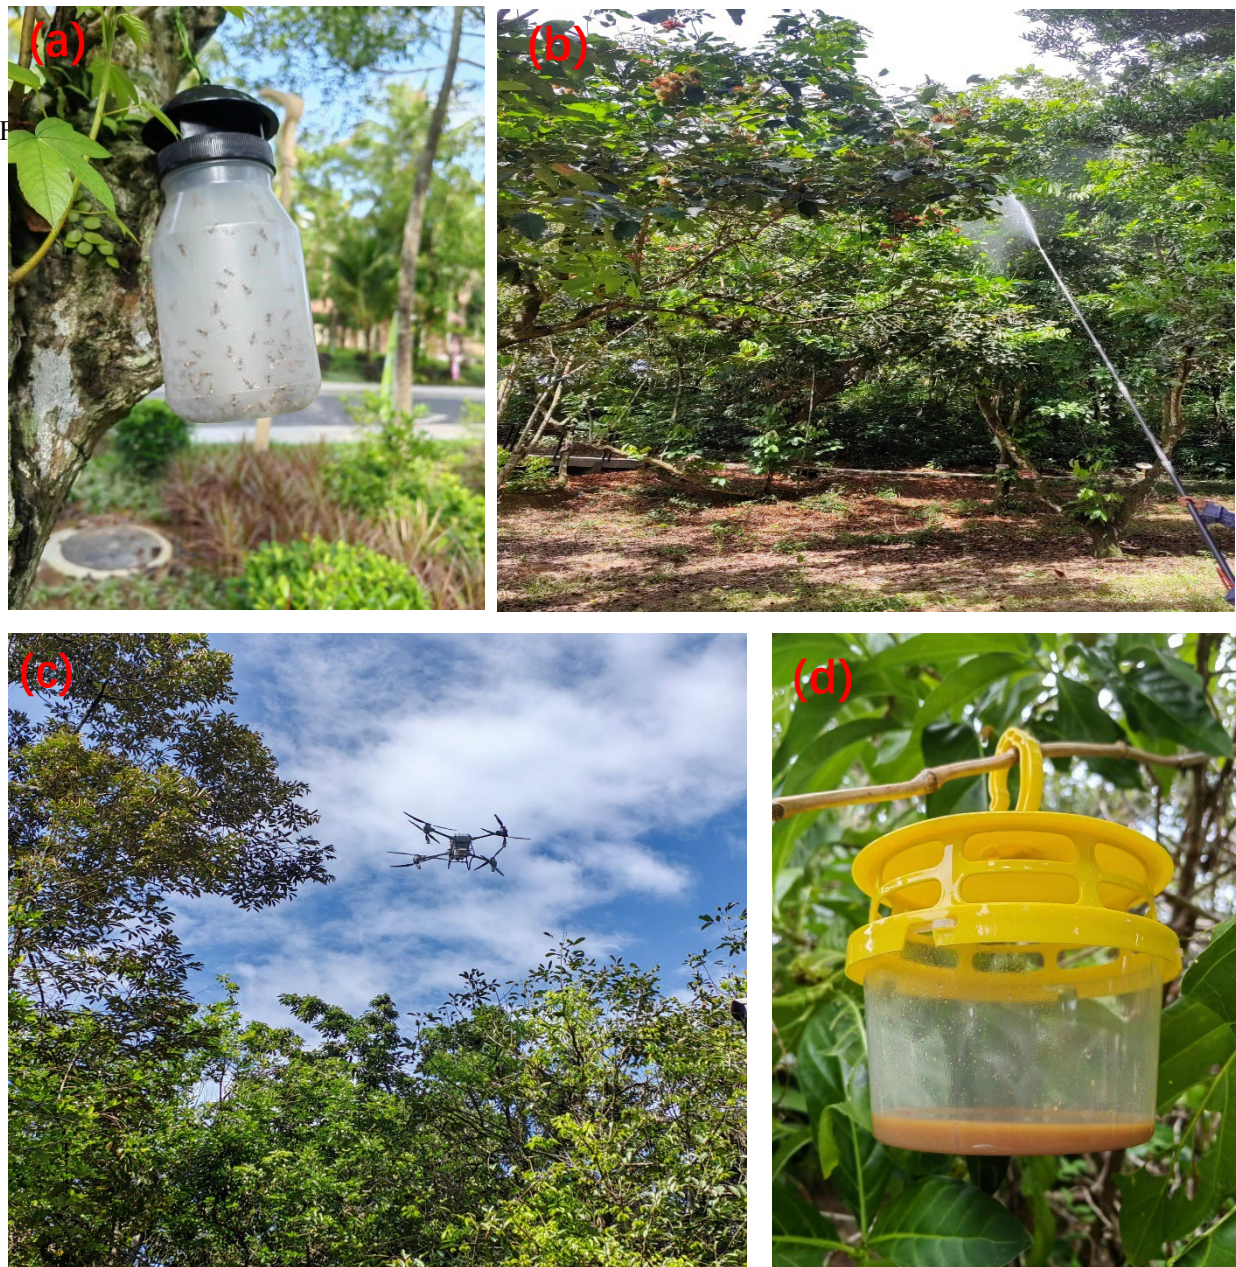

**Figure S1.** The ME bait trap was suspended outside the experimental plot (a); a manually operated push-pull system using a high-pressure agricultural sprayer (b); a drone-based push-pull system utilizing a drone for repellent and abamectin spraying (c); a food bait trap was placed outside the experimental plot (d). These photos were taken by Jian Wen and are copyrighted.
